# Supplementary material for: MC1R diversity in Northern Island Melanesia has not been constrained by strong purifying selection and cannot explain pigmentation phenotype variation in the region
Source: PubMed Central journal article supplement (PMC4615358; doi:10.1186/s12863-015-0277-x), 2015-10-19
Supplement: 12863_2015_277_MOESM1_ESM.pdf [file 12863_2015_277_MOESM1_ESM.pdf]

**Mean skin M (untransformed)**

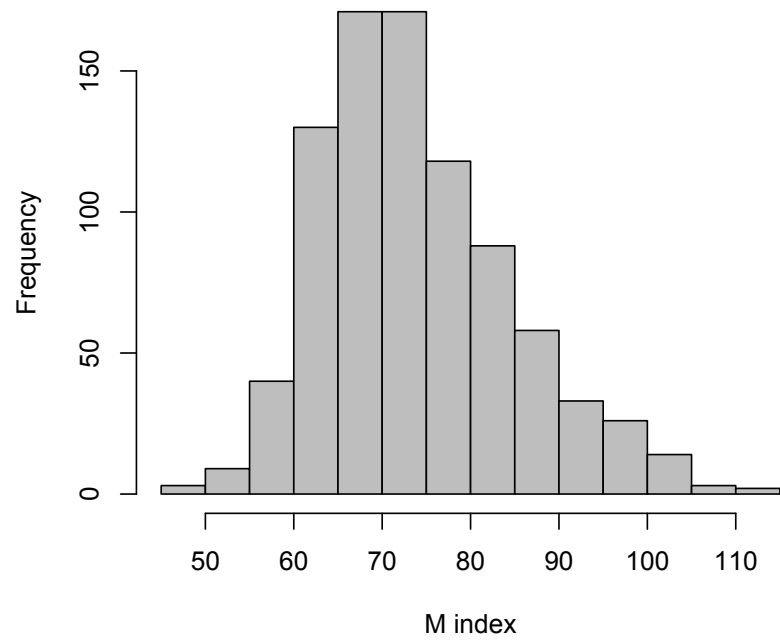

**Mean skin M (transformed)**

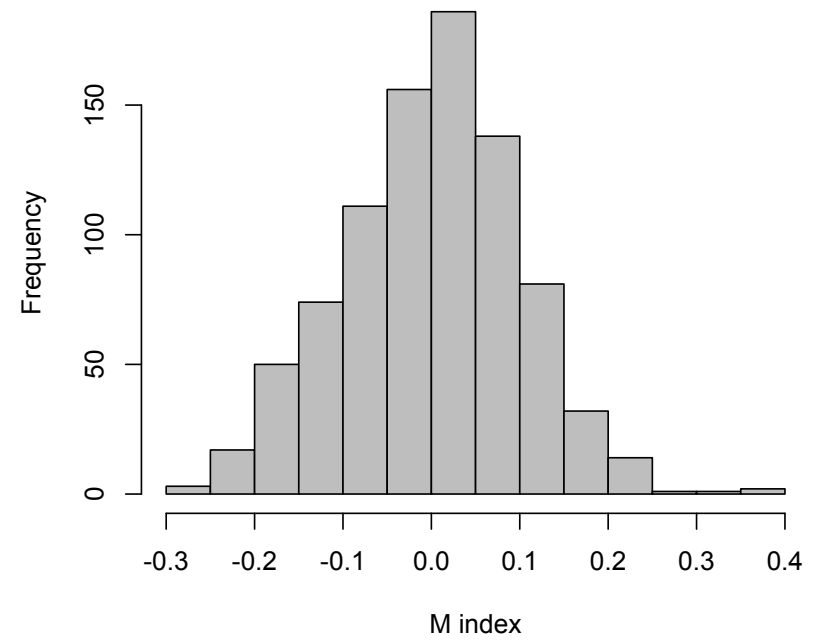

Additional Figure 1: Untransformed and transformed values of skin M index.
