# Supplementary material for: MC1R diversity in Northern Island Melanesia has not been constrained by strong purifying selection and cannot explain pigmentation phenotype variation in the region
Source: PubMed Central journal article supplement (PMC4615358; doi:10.1186/s12863-015-0277-x), 2015-10-19
Supplement: 12863_2015_277_MOESM2_ESM.pdf [file 12863_2015_277_MOESM2_ESM.pdf]

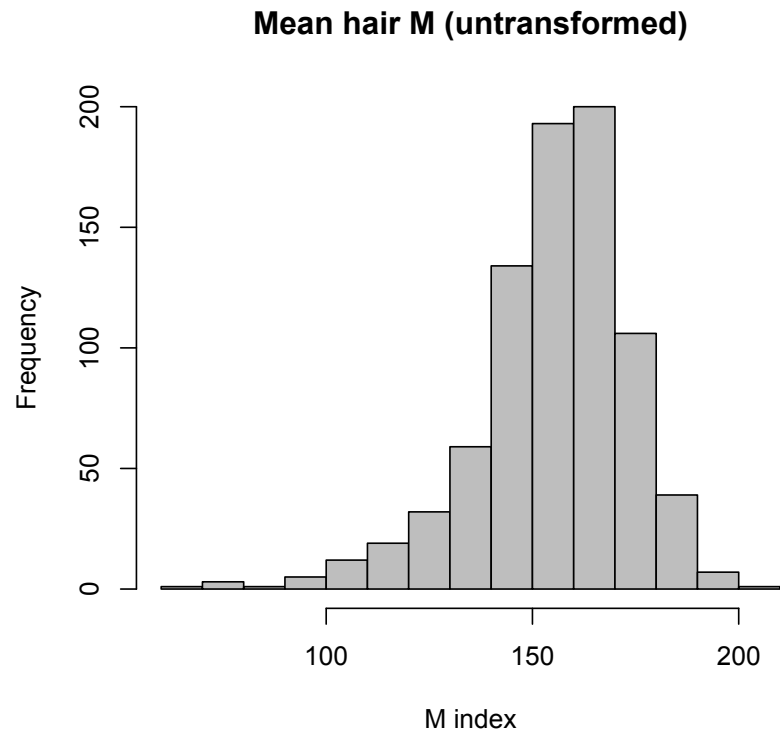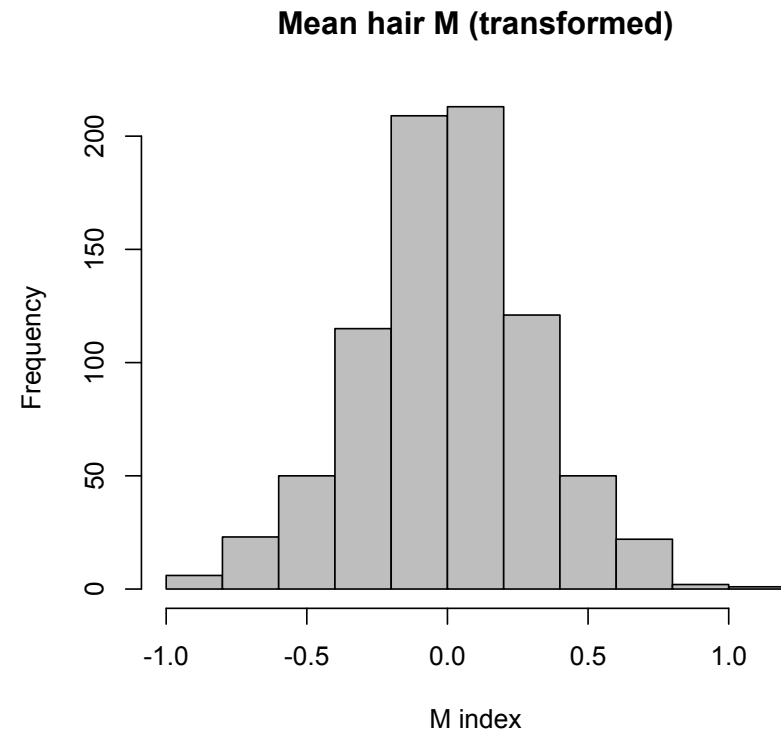

Supplementary Figure 2: Untransformed and transformed values of hair M index.
